# Supplementary material for: Study of the morphological, optical, structural and electrical properties of silicon nanowires at varying concentrations of the catalyst precursor
Source: Royal Society of Chemistry journal article supplement (doi:10.1039/d1ma01145f), 2022-01-01
Supplement: d1ma01145f1.pdf [file d1ma01145f1.pdf]

**Study of the Morphological, Optical, Structural and Electrical Properties of Silicon  
Nanowires at Varying Concentration of Catalyst Precursor**

Sadhna Rai,<sup>a</sup> Rabina Bhujel,<sup>a</sup> Manas Kumar Mondal,<sup>b</sup> Bibhu Prasad Swain,<sup>c\*</sup> and Joydeep

Biswas<sup>d\*</sup>

*<sup>a</sup>Centre for Materials Science and Nanotechnology, Sikkim Manipal Institute of Technology, Sikkim Manipal University, Majhitar, 737136, East Sikkim, India*

*<sup>b</sup>Department of Metallurgical and Materials Engineering, National Institute of Technology Durgapur, Durgapur-713209, India*

*<sup>c</sup>Department of Physics, National Institute of Technology, Manipur, Langol-795004, Manipur, India*

*<sup>d</sup> Department of Chemistry, Sikkim Manipal Institute of Technology, Sikkim Manipal University, Majhitar, 737136, East Sikkim, India*

\*Corresponding author email: joyiisc@gmail.com, joydeep.biswas@smit.smu.edu.in

\*Corresponding author email: bibhuprasad.swain@gmail.com, bpswain@nitmanipur.ac.in

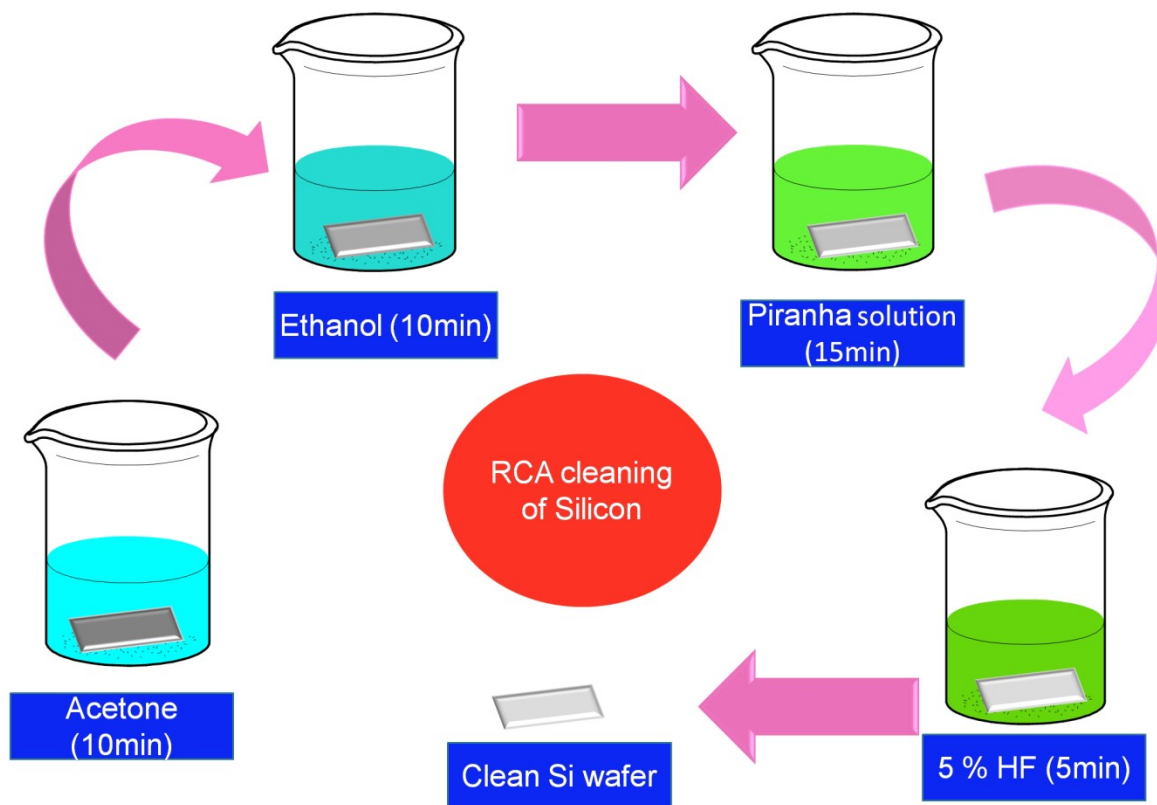

**Fig. S1.** RCA cleaning procedure for Si wafer

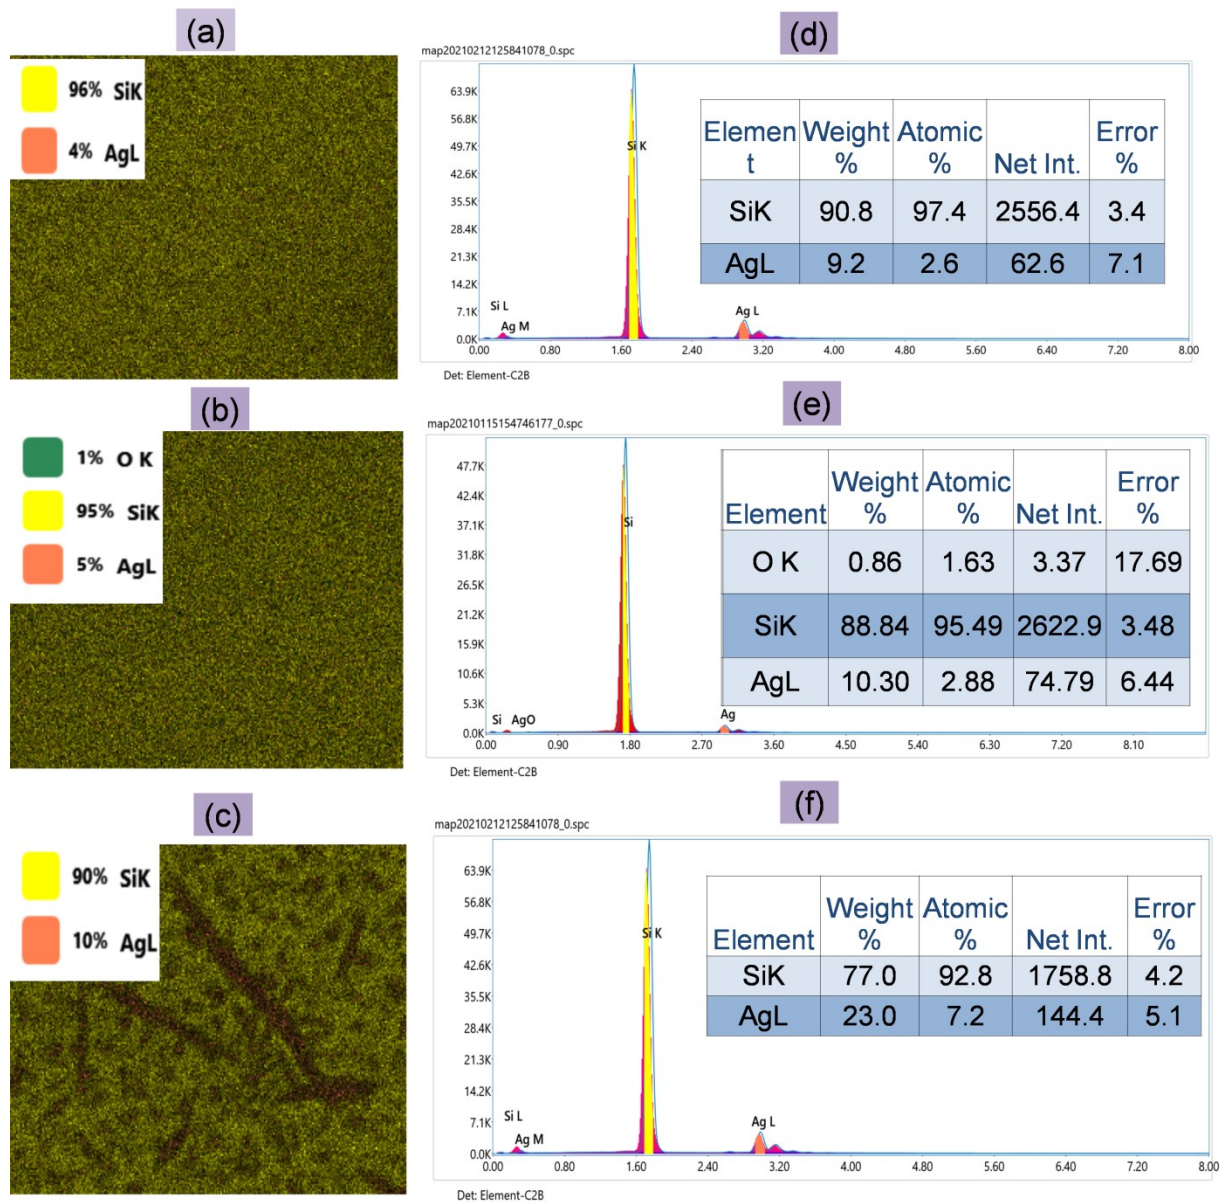

**Fig S2.** Elemental mapping of (a) 10A, (b) 20A and (c) 30A. EDX spectra of (d) 10A, (e) 20A and (f) 30A.

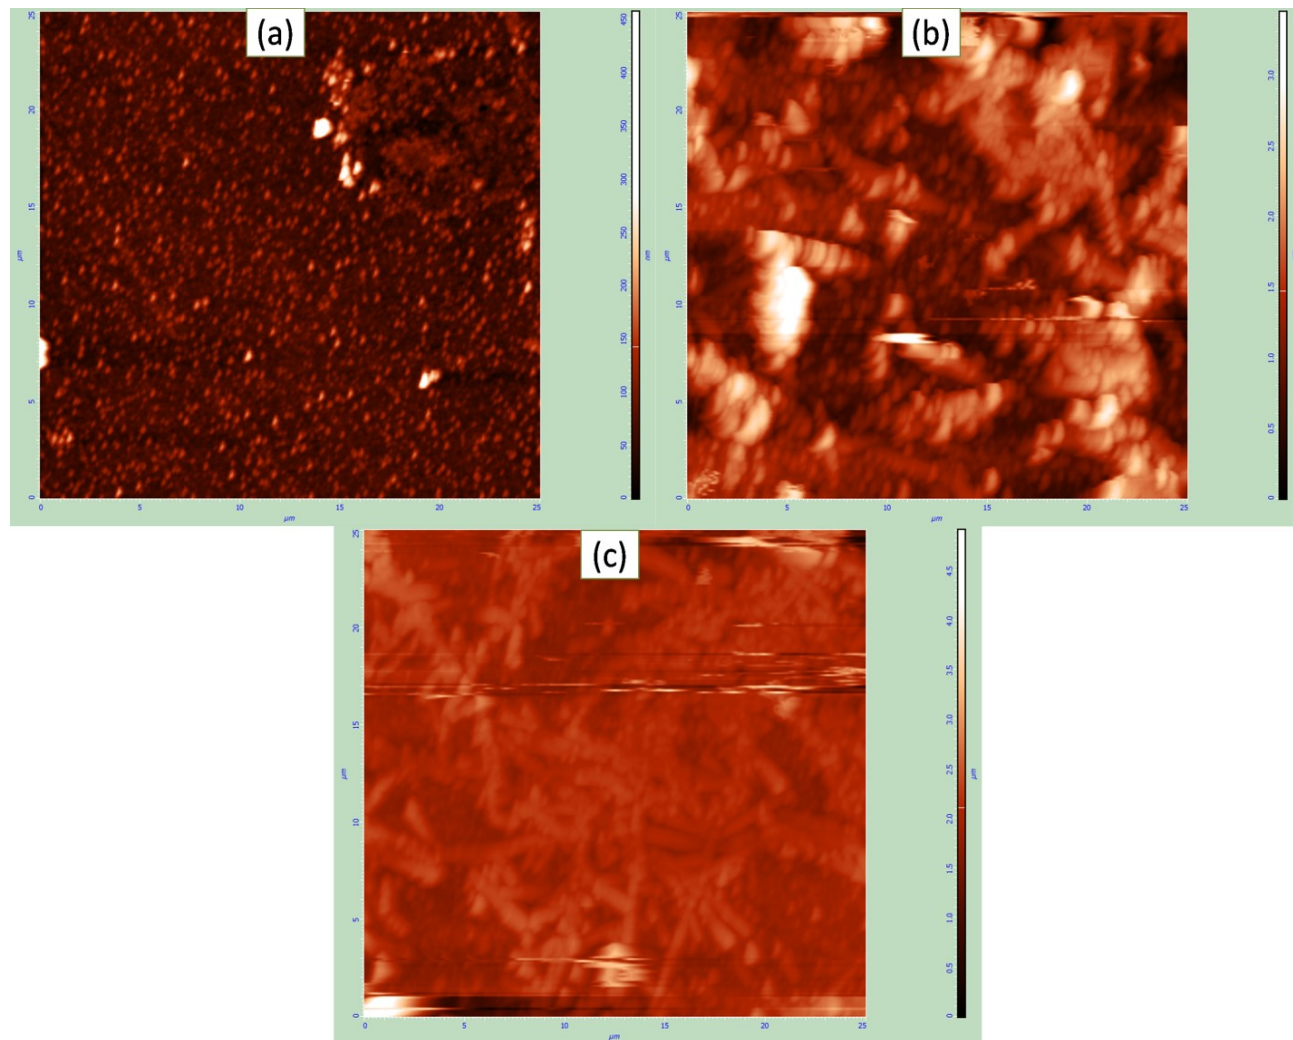

**Fig S3.** AFM images of (a) 10A, (b) 20A and (c) 30A.

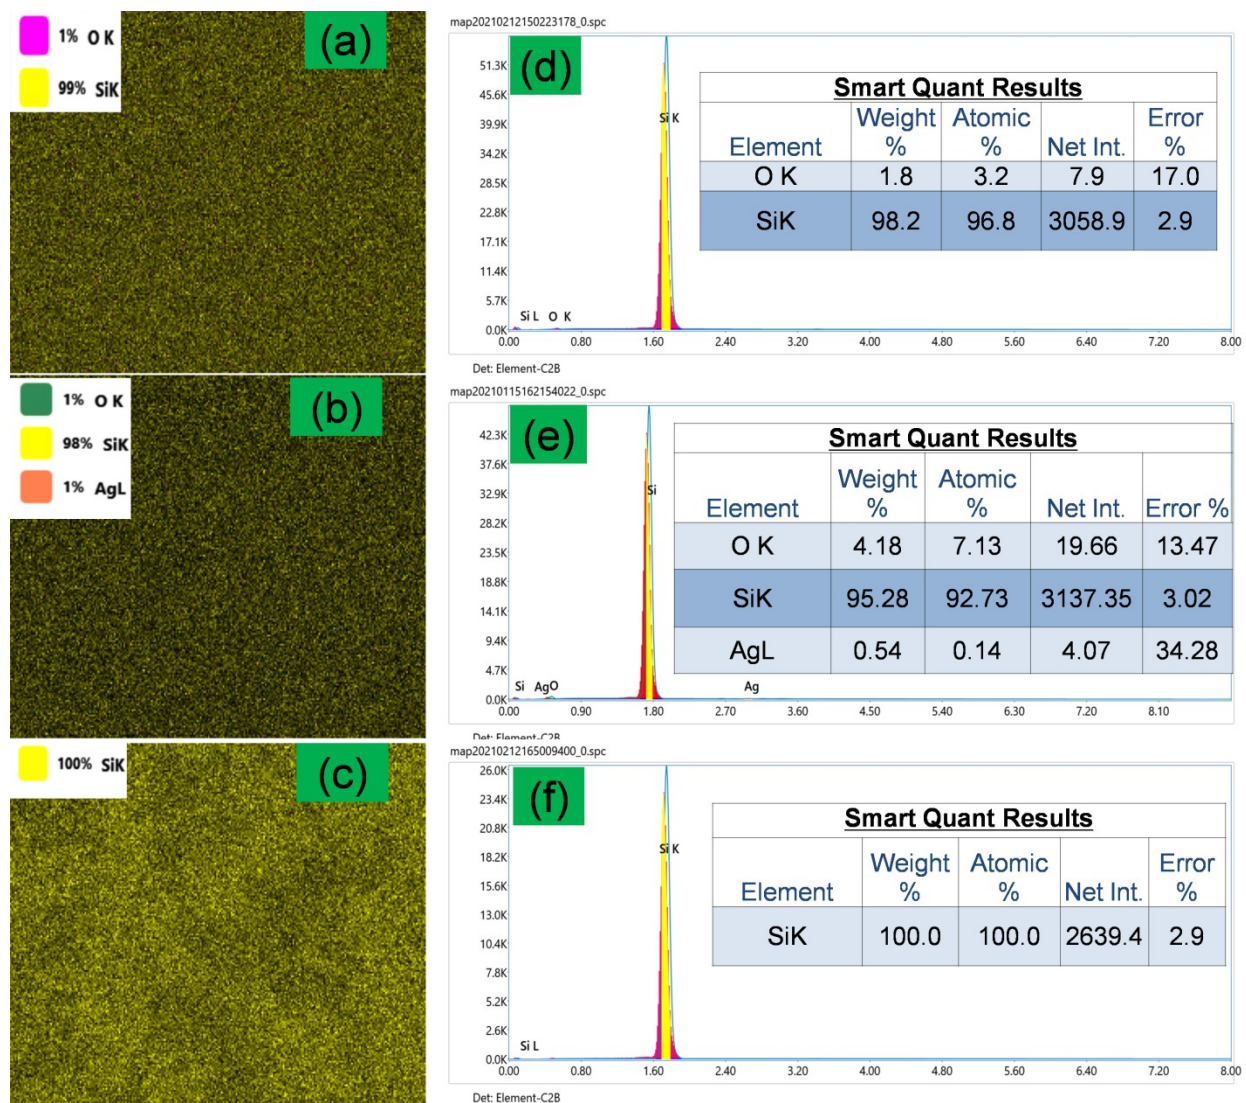

**Fig S4.** Elemental mapping of (a) 10S, (b) 20S and (c) 30S. EDX spectra of (d) 10S, (e) 20S and (f) 30S.

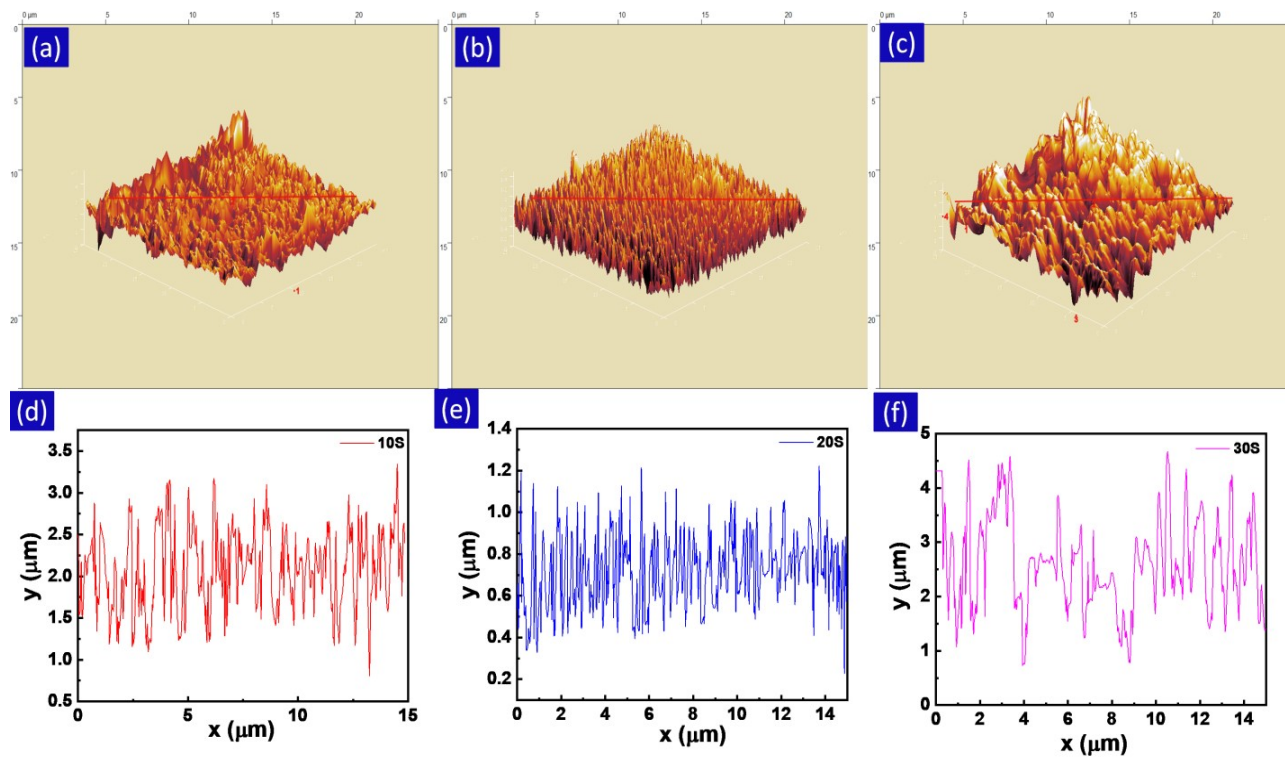

**Fig. S5.** (a), (b) and (c) 3D-AFM images and (e), (f) and (g) line profile for the calculation of the diameter of 10S, 20S and 30S, respectively.
